# Supplementary material for: Phylogenetic analysis, metabolic profiling, and environmental adaptation of strain LCG007: a novel Rhodobacteraceae isolated from the East China Sea intertidal zone
Source: Front Microbiol. 2025 Jan 7;15:1533195. doi: 10.3389/fmicb.2024.1533195 (PMC11747546; doi:10.3389/fmicb.2024.1533195)
Supplement: Supplementary file 10 [file Table_10.xlsx]

## Sheet: Sheet1
# Supplementary Table S10: Prediction of genes related to the adaptation of strain LCG007 to intertidal environments
Locus_tag	NCBI annotation	KEGG annotation
AB1M95_RS01445	MULTISPECIES: heat shock protein HspQ	heat shock protein HspQ
AB1M95_RS01770	cold-shock protein	cold shock protein
AB1M95_RS01835	cold-shock protein	cold shock protein
AB1M95_RS03450	cold-shock protein	cold shock protein
AB1M95_RS06395	cold shock domain-containing protein	cold shock protein
AB1M95_RS12120	hypothetical protein	ribosome-associated heat shock protein Hsp15
AB1M95_RS16040	MULTISPECIES: cold-shock protein	cold shock protein
AB1M95_RS00600	cryptochrome/photolyase family protein	(6-4)DNA photolyase [EC:4.1.99.13]
AB1M95_RS07780	deoxyribodipyrimidine photo-lyase	deoxyribodipyrimidine photo-lyase [EC:4.1.99.3]
AB1M95_RS02625	superoxide dismutase family protein	superoxide dismutase, Cu-Zn family [EC:1.15.1.1]
AB1M95_RS10550	superoxide dismutase family protein	superoxide dismutase, Cu-Zn family [EC:1.15.1.1]
AB1M95_RS12400	superoxide dismutase	superoxide dismutase, Fe-Mn family [EC:1.15.1.1]
AB1M95_RS07060	peroxidase family protein	peroxidase [EC:1.11.1.7]
AB1M95_RS08990	peroxidase	porphyrinogen peroxidase [EC:1.11.1.-]
AB1M95_RS11995	cytochrome c peroxidase	cytochrome c peroxidase [EC:1.11.1.5]
AB1M95_RS18645	glutathione peroxidase	glutathione peroxidase [EC:1.11.1.9]
AB1M95_RS09520	catalase/peroxidase HPI	catalase-peroxidase [EC:1.11.1.21]
AB1M95_RS10290	ferritin-like domain-containing protein	manganese catalase [EC:1.11.1.6]
AB1M95_RS16190	catalase	catalase [EC:1.11.1.6]
AB1M95_RS04645	BCCT family transporter	betaine/carnitine transporter, BCCT family
AB1M95_RS04565	choline ABC transporter substrate-binding protein	glycine betaine/proline transport system substrate-binding protein
AB1M95_RS04570	choline ABC transporter permease subunit	glycine betaine/proline transport system permease protein
AB1M95_RS04575	choline ABC transporter ATP-binding protein	glycine betaine/proline transport system ATP-binding protein [EC:7.6.2.9]
AB1M95_RS03405	ABC transporter permease subunit	glycine betaine/proline transport system permease protein
AB1M95_RS03410	betaine/proline/choline family ABC transporter ATP-binding protein	glycine betaine/proline transport system ATP-binding protein [EC:7.6.2.9]
AB1M95_RS03415	ABC transporter substrate-binding protein	glycine betaine/proline transport system substrate-binding protein
AB1M95_RS18890	4-aminobutyrate--2-oxoglutarate transaminase	4-aminobutyrate aminotransferase / (S)-3-amino-2-methylpropionate transaminase / 5-aminovalerate transaminase [EC:2.6.1.19 2.6.1.22 2.6.1.48]
AB1M95_RS04730	aminotransferase	putrescine---pyruvate transaminase [EC:2.6.1.113]
AB1M95_RS09460	gamma-aminobutyraldehyde dehydrogenase	aminobutyraldehyde dehydrogenase [EC:1.2.1.19]
AB1M95_RS17395	trehalose-phosphatase	trehalose 6-phosphate phosphatase [EC:3.1.3.12]
AB1M95_RS17400	trehalose-6-phosphate synthase	trehalose 6-phosphate synthase [EC:2.4.1.15 2.4.1.347]
